# Supplementary material
Source: publisher site journal article supplement (https://www.spandidos-publications.com/4176/downloadSupplementary)
Supplement: Supplementary file 1 [file downloadSupplementary]

## Sheet: GSE93541_diff_logFC1_p0.05
Table SVII. Differentially expressed circRNAs in GSE93541 dataset.
gene_name	logFC	AveExpr	t	P.Value	adj.P.Val	B	UP_DOWN	GSM2454433	GSM2454434	GSM2454435	GSM2454436	GSM2454437	GSM2454438
hsa_circRNA_000042	-2.10638	9.52308	-5.70604	0.00128286	0.0145248	-0.797235	DOWN	10.3702	8.23536	10.5951	7.95146	10.7635	9.22287
hsa_circRNA_000046	-1.83124	9.3188	-3.19484	0.0188978	0.0752047	-3.74639	DOWN	10.4514	9.14112	10.3702	7.11752	9.88167	8.95089
hsa_circRNA_000082	-4.50151	6.20431	-6.00292	0.000986263	0.0127922	-0.507632	DOWN	8.42883	4.14539	8.42219	2.32193	8.51417	5.39334
hsa_circRNA_000094	2.51024	7.56102	4.79342	0.00307702	0.0240776	-1.7619	UP	6.4379	8.91472	5.24272	9.06055	7.2371	8.47315
hsa_circRNA_000104	-1.30705	8.24774	-3.5339	0.0124487	0.0564708	-3.29442	DOWN	8.95719	7.78319	8.64936	6.86146	9.09723	8.138
hsa_circRNA_000166	4.63014	7.5504	6.4052	0.000701283	0.0106778	-0.132626	UP	6.77298	9.62104	3.84429	10.0622	5.08872	9.91318
hsa_circRNA_000200	-2.53578	10.3192	-11.5023	2.71987e-05	0.00207065	3.3459	DOWN	11.5396	8.91472	11.6073	9.39667	11.6143	8.84244
hsa_circRNA_000250	-1.07818	8.17682	-4.47428	0.00428866	0.028994	-2.12759	DOWN	8.78337	7.93387	8.84297	7.29029	8.52139	7.68904
hsa_circRNA_000552	1.89592	7.13301	2.77053	0.0326303	0.108212	-4.33066	UP	5.77776	6.82268	5.66855	8.33887	7.10884	9.08134
hsa_circRNA_000554	1.54556	7.9872	3.42138	0.0142706	0.061851	-3.44273	UP	6.87278	8.5788	8.18006	8.64216	6.59041	9.05897
hsa_circRNA_000585	2.40506	7.67937	8.25273	0.000177291	0.00554352	1.36651	UP	6.08101	8.88375	6.80344	8.53345	6.54607	9.22849
hsa_circRNA_000638	-1.03486	8.32899	-4.92262	0.00270087	0.0224134	-1.61817	DOWN	9.01038	7.90607	8.97546	7.80163	8.55342	7.72699
hsa_circRNA_000671	-1.17648	9.71876	-5.32176	0.00183068	0.0172225	-1.1893	DOWN	10.127	9.30442	10.2042	8.94602	10.5898	9.14112
hsa_circRNA_000679	1.3285	8.10192	6.60615	0.00059512	0.00964865	0.0475574	UP	7.3622	8.61972	7.37819	8.67753	7.57261	9.00126
hsa_circRNA_000684	-1.74883	10.169	-5.09685	0.00227339	0.0200036	-1.42816	DOWN	11.0117	9.42002	11.0378	8.60867	11.0808	9.85517
hsa_circRNA_000764	1.4325	11.6829	7.54526	0.000290319	0.00726213	0.831948	UP	10.787	12.4149	11.0165	12.2893	11.0963	12.4932
hsa_circRNA_000780	-1.15258	9.91569	-3.94366	0.00769651	0.0408381	-2.76968	DOWN	10.2555	9.01596	10.2631	9.62804	10.9574	9.3742
hsa_circRNA_000855	-2.93796	8.9405	-13.4279	1.11435e-05	0.00129665	4.24559	DOWN	10.2042	7.30557	10.3248	7.59765	10.6995	7.51133
hsa_circRNA_000864	-1.77913	12.1015	-6.96925	0.000446731	0.00878906	0.361736	DOWN	12.9133	10.7667	12.9397	11.5067	13.1201	11.3622
hsa_circRNA_000868	1.11171	8.10835	2.51995	0.0455548	0.132172	-4.68224	UP	6.6176	8.42709	8.08939	8.98924	7.95049	8.57628
hsa_circRNA_000881	-2.01409	12.8511	-6.20041	0.000832461	0.0117552	-0.321093	DOWN	13.5525	11.528	13.5733	11.9006	14.4487	12.1036
hsa_circRNA_000911	-1.72183	13.1896	-7.21954	0.000369154	0.00798011	0.570154	DOWN	13.9696	12.4553	14.1575	11.9366	14.0245	12.5942
hsa_circRNA_000926	-1.17638	9.65989	-3.43863	0.0139731	0.0608628	-3.41988	DOWN	10.4612	9.31144	10.127	8.38527	10.1561	9.51838
hsa_circRNA_000942	-1.06703	8.73991	-4.25385	0.00544019	0.0334312	-2.38912	DOWN	9.31144	7.88486	8.97546	8.36207	9.53339	8.37227
hsa_circRNA_000956	1.13882	12.7754	5.33806	0.00180261	0.0170615	-1.17225	UP	11.9659	13.463	12.2223	13.1668	12.43	13.4047
hsa_circRNA_000963	-1.04121	10.3869	-3.33987	0.0157739	0.0654503	-3.55123	DOWN	11.0378	10.1064	11.1673	9.36146	10.5174	10.131
hsa_circRNA_000987	1.0008	11.0984	2.79517	0.0315903	0.10617	-4.29628	UP	10.3526	10.9013	10.6412	12.126	10.8002	11.7692
hsa_circRNA_000993	-2.12167	10.1412	-6.8561	0.000487856	0.00918533	0.265363	DOWN	11.0808	8.99019	11.055	8.6325	11.4703	9.61844
hsa_circRNA_001038	1.50058	11.6994	8.33913	0.000167346	0.00542636	1.42879	UP	10.8726	12.43	10.9163	12.5607	11.0586	12.3585
hsa_circRNA_001040	-2.00134	10.3275	-9.54628	7.85451e-05	0.00327458	2.23808	DOWN	11.3008	9.20993	11.0963	9.36146	11.5875	9.4091
hsa_circRNA_001059	1.49377	10.3985	8.30702	0.000170965	0.00544292	1.40571	UP	9.58141	11.1087	9.74067	11.274	9.63275	11.0535
hsa_circRNA_001109	-1.26839	9.10675	-3.08403	0.0217412	0.0820448	-3.89719	DOWN	10.1172	8.63734	9.80458	7.72585	9.30099	9.05446
hsa_circRNA_001143	-1.09985	8.34989	-2.57846	0.0421126	0.127071	-4.59989	DOWN	8.9982	8.20838	8.61236	8.30239	9.08887	6.88911
hsa_circRNA_001175	-1.50915	10.5997	-4.58928	0.00379879	0.0268213	-1.99406	DOWN	11.6143	10.454	11.1916	9.71028	11.2569	9.37112
hsa_circRNA_001240	-1.20511	7.74779	-3.73502	0.00979983	0.0480658	-3.03379	DOWN	8.43545	6.93699	7.89298	6.88809	8.72262	7.61063
hsa_circRNA_001241	-1.65636	10.5628	-5.3112	0.00184913	0.0172225	-1.20035	DOWN	11.1916	9.35248	11.3742	9.52949	11.6073	10.322
hsa_circRNA_001264	-1.77026	8.15752	-5.61227	0.00139686	0.0149698	-0.891075	DOWN	8.94894	6.66101	9.11599	7.39829	9.06303	7.75787
hsa_circRNA_001309	-1.18893	7.46584	-2.45162	0.0499553	0.140451	-4.77852	DOWN	8.38095	5.88744	8.18502	7.56818	7.61493	7.15849
hsa_circRNA_001350	-1.4143	10.3631	-3.96478	0.00751332	0.0404795	-2.7433	DOWN	11.2024	9.77949	11.3896	9.07377	10.6187	10.1146
hsa_circRNA_001379	1.63204	9.48922	7.93824	0.000219734	0.00641256	1.1344	UP	8.69939	10.3972	8.76552	10.0443	8.5547	10.4742
hsa_circRNA_001389	-2.0025	9.60916	-6.30375	0.00076305	0.0112785	-0.225375	DOWN	10.9267	8.88883	10.6245	8.06445	10.28	8.87046
hsa_circRNA_001396	1.66994	8.17654	5.78502	0.00119503	0.0137664	-0.719087	UP	6.85212	9.12786	7.37095	9.06055	7.80163	8.84611
hsa_circRNA_001405	-1.64523	11.2145	-5.94559	0.00103683	0.0128353	-0.562684	DOWN	12.0174	10.6118	12.1036	9.86036	11.9904	10.7035
hsa_circRNA_001409	-1.33856	8.38023	-3.45785	0.0136498	0.0600522	-3.39447	DOWN	9.04356	7.22509	8.9254	7.36074	9.17957	8.54701
hsa_circRNA_001459	-4.53582	7.5405	-5.63665	0.00136615	0.014858	-0.86657	DOWN	10.0968	6.361	9.47174	3.39362	9.85673	6.06314
hsa_circRNA_001547	-4.34616	5.88887	-5.54282	0.00148878	0.015517	-0.96133	DOWN	9.04721	3.75806	7.47192	2.32193	7.66673	5.06737
hsa_circRNA_001587	-1.37847	9.04738	-3.71607	0.0100207	0.0486043	-3.0581	DOWN	9.97851	7.74559	9.9199	8.93353	9.31144	8.3953
hsa_circRNA_001594	1.25634	11.5242	7.08932	0.000407389	0.00829464	0.462523	UP	10.8895	12.1392	10.97	12.2611	10.8284	12.0566
hsa_circRNA_001654	-1.54714	10.9094	-7.42784	0.000316263	0.00745597	0.738768	DOWN	11.4779	10.0884	11.8267	9.97446	11.7442	10.3445
hsa_circRNA_001676	5.16545	10.5112	9.77684	6.86437e-05	0.00313309	2.38075	UP	8.23256	13.379	8.73029	12.6636	6.82268	13.2394
hsa_circRNA_001826	7.18431	5.91408	19.216	1.37434e-06	0.00034378	6.18909	UP	2.32193	10.0522	2.32193	8.70746	2.32193	9.75911
hsa_circRNA_002008	-1.02497	7.15749	-2.71001	0.0353444	0.113141	-4.41527	DOWN	7.14666	6.08101	8.17424	6.81843	7.68904	7.03558
hsa_circRNA_002086	-2.31	10.2635	-7.50109	0.000299779	0.00729045	0.797056	DOWN	11.3513	8.53345	11.3366	9.21074	11.5677	9.58141
hsa_circRNA_002117	3.3763	6.74703	2.87033	0.0286319	0.0994732	-4.19171	UP	2.32193	8.08142	5.8752	8.40598	6.97953	8.81814
hsa_circRNA_002143	2.40628	8.5547	9.05633	0.000105627	0.00402073	1.92272	UP	7.82356	9.722	7.25924	9.72995	6.97189	9.82156
hsa_circRNA_002144	5.35973	6.64039	7.11598	0.000399204	0.00822361	0.484698	UP	4.22469	9.23529	2.32193	9.07377	5.33496	9.6517
hsa_circRNA_002172	4.46296	6.90488	4.44468	0.00442603	0.0295801	-2.16228	UP	6.01561	9.1315	2.32193	8.68398	5.68266	9.5936
hsa_circRNA_100001	3.28231	11.255	14.5608	6.96317e-06	0.00107705	4.70478	UP	9.30004	13.047	9.85362	12.7531	9.68801	12.8885
hsa_circRNA_100044	1.21041	7.82782	2.97959	0.0248526	0.0897256	-4.04057	UP	7.73829	8.14736	6.40707	8.37299	7.52249	8.77872
hsa_circRNA_100048	-1.67314	7.50852	-3.0927	0.0215028	0.0814965	-3.88535	DOWN	7.69137	6.38996	7.82356	6.52403	9.52035	7.10185
hsa_circRNA_100051	1.73234	7.08861	2.83337	0.0300474	0.102755	-4.24308	UP	4.81744	7.87055	6.95066	7.75286	6.89921	8.24093
hsa_circRNA_100079	3.96712	5.722	5.14125	0.00217713	0.019351	-1.38045	UP	2.32193	8.2449	3.58853	7.7133	5.30487	7.15849
hsa_circRNA_100084	1.78133	8.83835	8.5023	0.00015027	0.00515925	1.54473	UP	7.90205	9.8165	8.15074	9.8632	7.79027	9.50736
hsa_circRNA_100086	-1.08823	10.8924	-4.46833	0.00431586	0.0290656	-2.13455	DOWN	11.8471	10.4085	11.1829	10.4124	11.2796	10.224
hsa_circRNA_100089	1.21672	7.40199	2.66761	0.0373892	0.117327	-4.47467	UP	5.94711	7.58268	7.37819	8.54733	7.05561	7.90105
hsa_circRNA_100104	-2.17836	7.32179	-5.94673	0.0010358	0.0128353	-0.56158	DOWN	8.0086	6.53703	8.51975	5.5555	8.70458	6.6053
hsa_circRNA_100115	-2.98727	6.39127	-2.59262	0.0413223	0.126055	-4.57999	DOWN	8.02253	2.32193	7.37819	6.97762	8.25399	5.39334
hsa_circRNA_100117	-1.72577	8.78376	-6.8128	0.000504733	0.00939821	0.228121	DOWN	9.97039	8.18832	9.37112	7.91705	9.59842	7.65723
hsa_circRNA_100136	-2.91979	6.83061	-2.72491	0.0346543	0.111544	-4.39441	DOWN	8.50527	3.04258	7.632	5.75791	8.73425	7.31164
hsa_circRNA_100147	-1.57582	8.71335	-4.07453	0.00663671	0.0371274	-2.60734	DOWN	9.02476	8.04	9.60862	7.2795	9.87041	8.45682
hsa_circRNA_100168	1.57595	8.43184	7.14987	0.000389072	0.00812996	0.512781	UP	7.66673	8.99679	7.58519	9.10227	7.67969	9.56039
hsa_circRNA_100192	1.47926	11.5	7.39657	0.000323617	0.00745597	0.713726	UP	10.6717	12.1036	10.6932	12.4553	10.9163	12.1601
hsa_circRNA_100228	3.81489	5.28259	5.83512	0.00114288	0.0133412	-0.669932	UP	2.32193	6.93699	4.76092	7.72585	3.04258	6.90725
hsa_circRNA_100230	-1.30779	9.81806	-5.94112	0.0010409	0.0128353	-0.566995	DOWN	10.6677	9.38772	10.5141	8.97498	10.2341	9.12979
hsa_circRNA_100257	1.25841	8.53628	4.98872	0.00252876	0.0212878	-1.54556	UP	7.54391	9.08045	8.29246	9.32537	7.88486	9.09063
hsa_circRNA_100272	1.69667	7.90498	7.40038	0.00032271	0.00745597	0.716785	UP	7.30253	8.70746	7.18517	8.77049	6.68224	8.782
hsa_circRNA_100290	1.08377	6.66262	2.48758	0.0475859	0.136149	-4.72784	UP	6.21651	7.62836	5.323	7.13302	6.82268	6.85212
hsa_circRNA_100323	1.7058	7.06328	5.03226	0.00242221	0.0208838	-1.49809	UP	5.70588	7.40256	6.4708	8.17091	6.45445	8.17507
hsa_circRNA_100327	3.18624	6.74594	2.757	0.0332172	0.109255	-4.34956	UP	5.94711	8.36207	7.05561	8.61329	2.45575	8.04182
hsa_circRNA_100356	1.4391	8.63324	5.55751	0.00146878	0.015493	-0.946422	UP	8.03267	9.33248	7.45008	9.3362	8.25831	9.3897
hsa_circRNA_100360	1.11073	7.57845	3.50702	0.0128593	0.0577351	-3.32969	UP	7.04472	8.55981	6.87278	8.3303	7.15174	7.51133
hsa_circRNA_100367	1.14784	13.3383	6.77344	0.000520657	0.00939821	0.194096	UP	12.7836	13.9456	12.7549	13.8456	12.7549	13.9456
hsa_circRNA_100389	2.97617	6.37391	2.58974	0.0414818	0.126249	-4.58404	UP	5.57581	8.56934	6.75973	7.85817	2.32193	7.15849
hsa_circRNA_100397	-1.69144	8.19327	-6.61128	0.000592664	0.00964865	0.0520932	DOWN	9.15025	6.9526	9.09833	7.7133	8.8684	7.37675
hsa_circRNA_100422	-1.73595	9.76281	-8.60022	0.000140991	0.00503827	1.61328	DOWN	10.7503	8.87046	10.3986	9.03534	10.7435	8.77872
hsa_circRNA_100438	-1.03651	11.1727	-2.66029	0.0377551	0.118052	-4.48495	DOWN	12.2718	10.3457	11.4115	11.2875	11.3896	10.3302
hsa_circRNA_100446	-1.49805	7.35717	-4.68498	0.00343897	0.0254078	-1.88445	DOWN	8.17466	6.61269	8.64517	6.59415	7.49875	6.6176
hsa_circRNA_100450	2.80524	5.97634	2.5462	0.0439752	0.129666	-4.64529	UP	4.52543	7.05017	2.32193	7.73773	6.87381	7.34899
hsa_circRNA_100470	-1.57524	8.18443	-3.00423	0.0240772	0.088015	-4.00665	DOWN	9.23509	6.21651	8.92218	7.96017	8.75888	8.01372
hsa_circRNA_100476	2.14231	7.23173	2.527	0.0451246	0.131689	-4.67231	UP	4.15891	8.44134	7.15259	8.49464	7.17022	7.97267
hsa_circRNA_100478	1.76063	6.57265	2.89556	0.0277069	0.0974194	-4.15671	UP	4.39436	7.60199	6.83432	7.44526	5.84832	7.31164
hsa_circRNA_100492	1.10241	12.1784	5.48083	0.0015767	0.01601	-1.02459	UP	11.6742	12.8315	11.7563	12.5259	11.4511	12.8315
hsa_circRNA_100498	1.5951	9.52039	5.87765	0.00110065	0.0132839	-0.628463	UP	8.23256	10.1618	8.89238	10.3835	9.04356	10.4085
hsa_circRNA_100533	1.29332	9.60561	6.01065	0.000979662	0.0127922	-0.50024	UP	8.89541	10.2991	8.78909	10.4209	9.19237	10.0369
hsa_circRNA_100560	-4.9704	5.51259	-11.9718	2.16156e-05	0.00189245	3.58075	DOWN	7.47192	2.32193	8.02715	3.48235	8.49431	3.27788
hsa_circRNA_100561	-2.87078	6.5346	-2.61784	0.0399525	0.123381	-4.54455	DOWN	8.74829	2.88876	7.18517	5.21709	7.9765	7.19176
hsa_circRNA_100565	1.1198	9.03934	5.68527	0.00130717	0.0146285	-0.817926	UP	8.49597	9.73222	8.60497	9.6642	8.33738	9.4013
hsa_circRNA_100568	3.74283	5.92444	4.64689	0.00357734	0.0256718	-1.92791	UP	2.32193	7.93387	5.62536	7.84306	4.21177	7.61063
hsa_circRNA_100587	1.24554	11.2864	6.63095	0.000583343	0.00963616	0.0694807	UP	10.8071	11.9659	10.4737	11.9146	10.7101	11.8471
hsa_circRNA_100606	-2.72448	6.23934	-2.52298	0.0453696	0.131964	-4.67798	DOWN	7.50539	5.72646	7.66614	2.32193	7.63321	6.5829
hsa_circRNA_100611	3.48675	5.91397	4.39387	0.00467353	0.0306492	-2.22214	UP	2.32193	7.67499	5.14417	8.00064	5.04569	7.29642
hsa_circRNA_100620	1.00734	8.72904	4.22815	0.00559581	0.0341403	-2.4201	UP	7.92795	9.20342	8.62216	9.26783	8.126	9.22689
hsa_circRNA_100640	1.84257	8.73334	6.75394	0.000528762	0.00939821	0.17717	UP	7.34973	9.77264	7.96692	9.77264	8.11953	9.41862
hsa_circRNA_100647	-5.49487	5.65459	-13.7454	9.73153e-06	0.00129665	4.37905	DOWN	8.56172	2.64147	8.27936	3.75806	8.36499	2.32193
hsa_circRNA_100653	4.80862	7.31995	4.41581	0.00456479	0.0300487	-2.19625	UP	5.90359	9.71716	6.52141	9.91318	2.32193	9.54244
hsa_circRNA_100655	2.09212	8.07696	8.901	0.000116373	0.00433551	1.81912	UP	6.63222	9.13664	7.28027	9.13407	7.18021	9.09833
hsa_circRNA_100656	5.53392	6.32171	9.7484	6.97832e-05	0.00313309	2.36334	UP	4.5666	9.14495	2.32193	9.19072	3.77573	8.93033
hsa_circRNA_100657	1.36944	7.2191	4.95535	0.00261405	0.0217962	-1.58214	UP	6.80344	7.73378	6.77298	7.95146	6.02672	8.02623
hsa_circRNA_100694	-1.24887	6.81976	-4.11141	0.00636832	0.0365573	-2.56206	DOWN	7.57765	6.17386	7.37819	6.72946	7.37675	5.68266
hsa_circRNA_100713	1.12272	6.78124	3.32788	0.0160093	0.0661455	-3.56726	UP	6.86042	7.30557	5.62536	7.36074	6.17386	7.36147
hsa_circRNA_100719	-3.75269	7.19374	-2.73939	0.0339979	0.110857	-4.37417	DOWN	8.84558	7.83939	9.85049	2.32193	8.51417	5.79085
hsa_circRNA_100748	-4.20947	5.61516	-4.15764	0.00604889	0.0351881	-2.50559	DOWN	7.96066	5.88744	8.01883	2.32193	7.18021	2.32193
hsa_circRNA_100754	1.12408	9.26546	3.94987	0.00764208	0.0406726	-2.76191	UP	8.4503	9.58705	8.95767	10.3076	8.70228	9.58783
hsa_circRNA_100757	-2.74061	6.34189	-2.60449	0.0406715	0.12494	-4.56331	DOWN	7.82356	2.78792	7.34899	4.99381	7.96403	7.13302
hsa_circRNA_100790	4.85297	6.00994	4.65255	0.00355641	0.0256718	-1.92145	UP	2.32193	8.07252	6.06314	8.782	2.36531	8.45476
hsa_circRNA_100799	-1.97332	6.95884	-4.60164	0.00375	0.026584	-1.97983	DOWN	7.55992	6.15373	7.60199	6.40423	8.67459	5.3586
hsa_circRNA_100815	1.53803	9.31538	6.02598	0.000966724	0.0127922	-0.485606	UP	8.18047	9.86217	8.55917	10.2003	8.89945	10.1907
hsa_circRNA_100827	-1.41657	7.84082	-7.65631	0.000268016	0.0069014	0.918868	DOWN	8.43267	7.27018	8.66958	7.06461	8.54508	7.06282
hsa_circRNA_100832	-1.61247	7.40461	-4.21142	0.00569977	0.0341638	-2.44032	DOWN	7.47192	6.51617	8.87123	6.46265	8.28939	6.8163
hsa_circRNA_100835	3.36283	5.99585	3.17874	0.0192844	0.0764501	-3.76821	UP	2.32193	7.23869	6.48966	8.50129	4.13173	7.29183
hsa_circRNA_100859	-1.6857	6.7529	-5.04336	0.00239586	0.0208714	-1.48603	DOWN	7.54391	6.59041	7.77279	5.62048	7.47056	5.51926
hsa_circRNA_100879	-2.86428	6.00256	-2.79098	0.0317643	0.106339	-4.30212	DOWN	7.56818	4.93214	7.81076	2.32193	6.92517	6.45719
hsa_circRNA_100882	-2.08736	9.83366	-11.0322	3.45395e-05	0.0023115	3.09956	DOWN	10.8002	8.93427	10.8201	8.79532	11.0117	8.64035
hsa_circRNA_100883	-5.20513	8.99366	-3.09609	0.0214101	0.0814965	-3.88071	DOWN	11.8567	8.41868	11.6622	2.32193	11.2697	8.43267
hsa_circRNA_100888	-1.64645	6.88485	-3.09542	0.0214284	0.0814965	-3.88163	DOWN	7.38971	5.34091	8.04547	7.22348	7.68904	5.62048
hsa_circRNA_100891	-1.80417	7.93757	-4.75212	0.00320954	0.0242237	-1.80837	DOWN	8.54765	7.67499	9.15025	7.06461	8.82107	6.36684
hsa_circRNA_100908	1.10542	8.18527	3.36744	0.0152466	0.0644851	-3.51442	UP	7.51856	8.07252	7.79893	9.0155	7.58017	9.12592
hsa_circRNA_100970	2.57087	10.0988	7.67887	0.00026373	0.0068924	0.936386	UP	8.45682	11.6906	8.77186	10.8284	9.21156	11.6338
hsa_circRNA_100997	-2.01857	8.38918	-4.18021	0.00589952	0.0346646	-2.47814	DOWN	9.55305	7.61124	8.85548	6.46265	9.78686	8.0658
hsa_circRNA_100999	3.29034	6.24427	3.32088	0.0161486	0.0665321	-3.57663	UP	5.57581	7.29413	2.32193	7.90105	5.89957	8.47315
hsa_circRNA_101030	-1.8504	7.70004	-3.75157	0.00961145	0.0474075	-3.0126	DOWN	9.02983	7.66732	8.24093	5.8711	8.60497	6.78611
hsa_circRNA_101055	3.02997	7.35805	9.15889	9.9161e-05	0.00394616	1.99015	UP	6.36975	8.60867	5.85457	8.83667	5.30487	9.17375
hsa_circRNA_101058	-1.19566	7.23146	-3.17169	0.0194564	0.0767302	-3.77777	DOWN	7.80647	6.27202	8.02715	6.20026	7.65425	7.42861
hsa_circRNA_101063	-1.69404	6.90395	-5.83707	0.00114091	0.0133412	-0.668031	DOWN	7.53161	6.59041	7.87772	5.83364	7.84358	5.74675
hsa_circRNA_101092	-2.85457	7.29475	-3.29682	0.0166373	0.0672507	-3.60887	DOWN	9.03419	6.21651	8.95767	3.9876	8.17424	7.39829
hsa_circRNA_101119	5.46858	5.05622	19.6911	1.19053e-06	0.00034378	6.3117	UP	2.32193	8.19982	2.32193	7.89298	2.32193	7.27873
hsa_circRNA_101128	3.15995	9.21192	6.93855	0.000457483	0.00880278	0.335717	UP	7.81076	11.2245	7.55737	9.77703	7.52771	11.3742
hsa_circRNA_101136	-1.74454	8.62988	-7.23663	0.000364451	0.00797693	0.584146	DOWN	9.54373	7.73942	9.38665	8.11953	9.57607	7.41388
hsa_circRNA_101170	2.13487	6.62206	2.99561	0.0243455	0.0882588	-4.01851	UP	6.42397	7.40256	4.15891	8.60312	6.08101	7.06282
hsa_circRNA_101175	1.42003	7.50046	3.37418	0.0151209	0.0641082	-3.50545	UP	6.51879	8.09731	7.69544	8.36864	6.15711	8.16548
hsa_circRNA_101201	1.09269	11.9925	6.29771	0.00076692	0.0112785	-0.230935	UP	11.399	12.5942	11.528	12.4617	11.4115	12.5607
hsa_circRNA_101221	-1.24925	7.30755	-2.56397	0.0429389	0.128085	-4.62029	DOWN	7.93387	6.10391	7.29489	6.44344	8.56775	7.50141
hsa_circRNA_101227	1.03375	9.6416	5.80445	0.00117449	0.0136194	-0.699984	UP	9.02983	10.1436	9.09833	10.0977	9.24602	10.2341
hsa_circRNA_101246	1.30701	7.68452	4.28379	0.00526508	0.0331624	-2.35317	UP	6.47757	8.23216	7.08778	8.46024	7.52771	8.32169
hsa_circRNA_101248	-1.77269	8.35945	-4.12301	0.00628644	0.0362091	-2.54786	DOWN	9.17458	8.25635	9.2727	6.59415	9.29009	7.56882
hsa_circRNA_101272	1.81127	6.61202	3.30714	0.0164258	0.0670049	-3.59504	UP	6.75306	7.40256	4.5666	7.50935	5.79951	7.64106
hsa_circRNA_101282	-1.42342	10.0028	-4.89139	0.00278678	0.0229092	-1.65269	DOWN	10.3835	9.51969	10.5626	8.99914	11.1975	9.3545
hsa_circRNA_101305	-2.99567	6.9398	-10.0506	5.87094e-05	0.00308685	2.54564	DOWN	8.39245	4.87593	8.46433	5.89957	8.45613	5.55038
hsa_circRNA_101306	-1.81474	7.51268	-4.25675	0.00542298	0.0334312	-2.38564	DOWN	8.15581	5.69199	8.48461	6.99091	8.61972	7.13302
hsa_circRNA_101308	-1.0422	7.15141	-2.87482	0.028465	0.0992871	-4.18548	DOWN	7.51133	5.88744	7.72301	7.17022	7.78319	6.83327
hsa_circRNA_101318	2.63248	5.81316	2.80438	0.0312104	0.105705	-4.28344	UP	2.32193	6.7872	6.00442	7.33863	5.16443	7.26237
hsa_circRNA_101332	1.0001	8.83422	3.40833	0.0145002	0.06223	-3.46003	UP	8.45682	9.7432	8.15074	8.80046	8.39495	9.45915
hsa_circRNA_101372	1.21692	7.18548	4.26152	0.00539475	0.0334312	-2.37991	UP	6.34925	7.87055	6.97476	7.41529	6.40707	8.09599
hsa_circRNA_101373	-1.91119	9.08675	-7.88531	0.000227978	0.00654408	1.09449	DOWN	9.85673	8.2449	9.87528	7.88791	10.395	8.26067
hsa_circRNA_101404	-3.00302	8.2803	-6.01299	0.000977674	0.0127922	-0.498003	DOWN	9.43226	5.97796	9.54373	7.67617	10.3694	6.68224
hsa_circRNA_101405	-3.29856	6.1302	-10.9128	3.67555e-05	0.0023115	3.03511	DOWN	8.11996	4.33603	7.45008	4.15891	7.76838	4.94781
hsa_circRNA_101407	-2.25341	8.60816	-3.95855	0.00756688	0.0405187	-2.75108	DOWN	9.25667	7.42021	9.22367	8.27781	10.7243	6.74635
hsa_circRNA_101408	1.00407	9.37408	5.6815	0.00131163	0.0146285	-0.821684	UP	8.7365	9.86552	8.97115	9.88231	8.90848	9.88052
hsa_circRNA_101412	-4.10236	8.69328	-16.5586	3.28913e-06	0.000575927	5.4119	DOWN	10.6594	6.361	10.5503	6.61269	11.0237	6.9526
hsa_circRNA_101425	2.40656	5.78174	3.63327	0.0110523	0.0521631	-3.16493	UP	5.31094	6.74635	5.38185	7.2561	3.04258	6.9526
hsa_circRNA_101427	-3.63968	6.32687	-2.75739	0.0332	0.109255	-4.34901	DOWN	7.9235	2.32193	8.25831	3.58853	8.25831	7.61063
hsa_circRNA_101440	-2.03992	7.10876	-6.41185	0.00069744	0.0106778	-0.126591	DOWN	7.88079	5.91559	8.12514	5.68266	8.38023	6.66813
hsa_circRNA_101478	3.50464	8.97118	12.2201	1.92069e-05	0.00177007	3.7007	UP	7.32445	10.5434	7.48002	11.1476	6.85212	10.4795
hsa_circRNA_101501	-1.17582	8.66398	-4.26066	0.00539984	0.0334312	-2.38094	DOWN	9.15995	7.6186	9.07065	8.27781	9.52509	8.3318
hsa_circRNA_101522	-4.74876	7.20246	-4.29861	0.00518073	0.0328676	-2.33542	DOWN	9.06662	6.72946	9.8936	2.32193	9.7703	5.43284
hsa_circRNA_101525	-1.49782	13.4708	-5.54447	0.00148652	0.015517	-0.959654	DOWN	14.3111	12.9397	14.4487	12.3229	13.8993	12.9031
hsa_circRNA_101527	1.19306	6.68998	3.47641	0.0133453	0.0591585	-3.36998	UP	5.59832	6.91922	6.03774	7.31315	6.64429	7.62714
hsa_circRNA_101539	1.87601	8.08731	8.14017	0.000191291	0.00577501	1.28441	UP	6.78611	9.1242	7.25216	8.98924	7.40964	8.9625
hsa_circRNA_101541	1.83737	7.62924	5.86681	0.00111125	0.0132839	-0.639013	UP	6.17386	8.58319	6.6752	8.59692	7.28259	8.46365
hsa_circRNA_101555	1.24573	10.6686	5.43241	0.00164949	0.0161864	-1.07436	UP	9.9627	11.2	10.2258	11.6193	9.94853	11.055
hsa_circRNA_101589	-1.3566	9.01035	-3.39037	0.014823	0.0629976	-3.4839	DOWN	9.23748	7.83939	9.44852	8.77653	10.38	8.38023
hsa_circRNA_101592	2.00737	8.31768	6.26519	0.000788142	0.0113118	-0.260939	UP	7.59703	9.70511	7.57198	9.06662	6.77298	9.19237
hsa_circRNA_101656	-1.48773	11.0279	-4.8501	0.00290516	0.0235506	-1.69855	DOWN	12.1824	10.4263	11.9006	10.0068	11.2322	10.4189
hsa_circRNA_101674	-1.21992	8.33241	-3.92946	0.00782243	0.0412563	-2.78744	DOWN	8.39245	7.58268	9.41545	7.95146	9.01921	7.63321
hsa_circRNA_101689	-1.04419	7.88074	-5.42904	0.00165469	0.0161864	-1.07783	DOWN	8.62399	7.34899	8.32619	7.41529	8.25831	7.31164
hsa_circRNA_101695	-1.42054	10.123	-6.0604	0.000938372	0.0127856	-0.452844	DOWN	11.0713	9.64466	10.8002	9.47174	10.6283	9.12183
hsa_circRNA_101704	-4.23564	5.03842	-7.63055	0.000273008	0.00692808	0.898809	DOWN	7.64227	2.32193	6.90725	2.32193	6.91922	4.11795
hsa_circRNA_101706	-1.50751	9.29589	-3.98717	0.00732446	0.0402041	-2.71542	DOWN	9.53728	8.79695	10.0353	8.85678	10.5764	7.97267
hsa_circRNA_101711	-1.07626	9.13917	-4.67077	0.00348987	0.0254767	-1.90064	DOWN	9.74908	8.92416	9.75772	8.30961	9.52509	8.56934
hsa_circRNA_101712	1.2248	8.01605	3.74378	0.00969962	0.047708	-3.02257	UP	7.44733	8.77982	7.96017	8.57534	6.80344	8.5302
hsa_circRNA_101728	-1.01992	7.18504	-2.48784	0.0475692	0.136149	-4.72747	DOWN	7.67852	7.48137	7.70699	5.89957	7.69949	6.64429
hsa_circRNA_101753	-3.22979	9.30166	-7.35344	0.000334084	0.00759715	0.679035	DOWN	10.9163	8.4893	11.1402	7.73773	10.6932	6.83327
hsa_circRNA_101788	-1.31387	7.14151	-2.68774	0.0364032	0.115272	-4.44646	DOWN	7.63503	7.50539	7.57198	5.75791	8.18832	6.19041
hsa_circRNA_101798	1.512	11.8618	7.4156	0.000319117	0.00745597	0.728983	UP	11.2187	12.4932	11.1975	12.814	10.9013	12.5463
hsa_circRNA_101826	1.85976	7.11221	5.73895	0.0012454	0.0142529	-0.764577	UP	6.51879	7.88486	5.59583	8.37806	6.43234	7.86334
hsa_circRNA_101839	-3.51526	7.17455	-2.79676	0.0315244	0.106152	-4.29407	DOWN	9.74067	2.78792	9.13236	5.78432	7.9235	7.67852
hsa_circRNA_101850	1.07065	10.0483	5.4089	0.0016862	0.0162228	-1.09864	UP	9.62104	10.3702	9.52623	10.7444	9.39167	10.6363
hsa_circRNA_101861	-1.55929	8.52888	-5.10803	0.00224871	0.0198863	-1.41613	DOWN	9.49791	7.24979	9.1242	8.26302	9.30347	7.73491
hsa_circRNA_101871	2.28098	6.89254	3.72694	0.00989328	0.0482539	-3.04415	UP	6.20352	7.37819	6.40707	8.90748	4.64557	7.81344
hsa_circRNA_101881	-1.14292	8.04495	-4.71384	0.00333814	0.0248727	-1.85167	DOWN	8.45682	7.19423	8.45202	7.58519	8.9404	7.64106
hsa_circRNA_101887	-1.8263	8.18369	-3.30562	0.0164567	0.0670049	-3.59707	DOWN	9.50388	7.43	8.58445	8.19121	9.2022	6.19041
hsa_circRNA_101901	2.00076	9.04244	6.12705	0.000886141	0.0123145	-0.389827	UP	8.68134	9.88167	7.61493	10.0038	7.82991	10.243
hsa_circRNA_101902	1.53141	8.66437	5.47015	0.00159243	0.01601	-1.03554	UP	7.59019	9.04448	8.22656	9.73476	7.87925	9.51099
hsa_circRNA_101905	-1.27445	9.12325	-4.25872	0.00541128	0.0334312	-2.38327	DOWN	9.8936	7.91406	9.56865	8.73763	9.81916	8.80638
hsa_circRNA_101906	1.51666	12.3491	6.7076	0.000548609	0.00939821	0.136789	UP	11.4365	12.7836	11.7165	13.3392	11.6193	13.1995
hsa_circRNA_101914	-1.27596	9.90484	-2.95831	0.025544	0.0914674	-4.06992	DOWN	10.4481	9.79555	10.5764	8.30239	10.604	9.70266
hsa_circRNA_101924	1.22773	9.73146	5.86278	0.00111521	0.0132839	-0.642939	UP	9.09284	10.0553	9.05491	10.536	9.20505	10.4447
hsa_circRNA_101943	-2.35114	9.95471	-5.42075	0.00166758	0.0162219	-1.08639	DOWN	11.3366	9.30004	11.2875	7.87619	10.7667	9.16121
hsa_circRNA_101945	-2.20676	6.80077	-3.34581	0.0156587	0.065308	-3.54329	DOWN	7.9765	6.77188	7.45968	6.04504	8.27626	4.27524
hsa_circRNA_101957	-1.33861	9.36503	-3.90636	0.00803226	0.0414882	-2.81642	DOWN	9.98683	8.65235	9.79703	8.14396	10.3191	9.29086
hsa_circRNA_101958	-1.29029	11.3317	-6.95286	0.000452432	0.00880232	0.347863	DOWN	11.9366	10.5141	11.93	10.8071	12.0639	10.7384
hsa_circRNA_101969	-1.00324	8.41624	-4.80944	0.00302732	0.0240448	-1.74396	DOWN	8.76663	8.11996	8.91696	7.93485	9.06998	7.68904
hsa_circRNA_102010	4.40663	5.88696	3.75286	0.00959702	0.0474075	-3.01096	UP	2.32193	8.77653	2.32193	7.39829	6.40707	8.09599
hsa_circRNA_102014	1.70299	6.44356	2.46661	0.0489529	0.13915	-4.75739	UP	4.34788	7.49209	5.4767	6.6752	6.95163	7.71788
hsa_circRNA_102033	1.14268	9.071	5.45426	0.00161618	0.0160478	-1.05186	UP	8.4503	9.68363	8.36791	9.41228	8.68076	9.83109
hsa_circRNA_102041	-1.80014	7.50495	-3.29531	0.0166686	0.0672507	-3.6109	DOWN	8.46976	7.74559	8.35033	5.5555	8.39495	6.51354
hsa_circRNA_102045	-1.74772	8.81619	-4.56366	0.00390219	0.0272221	-2.02364	DOWN	9.83846	8.36207	9.39059	7.15681	9.84109	8.3081
hsa_circRNA_102046	-2.50156	7.51763	-3.35552	0.0154722	0.0648335	-3.53033	DOWN	8.24965	5.43284	9.29392	7.93485	8.76165	5.43284
hsa_circRNA_102049	3.71204	11.491	10.9892	3.53177e-05	0.0023115	3.07648	UP	9.54373	13.6123	9.61936	12.6466	9.74194	13.7823
hsa_circRNA_102051	4.05587	9.54639	13.4609	1.09862e-05	0.00129665	4.25964	UP	7.93926	11.7113	7.67322	11.5338	6.94286	11.4779
hsa_circRNA_102061	1.16546	13.3838	5.70355	0.00128575	0.0145248	-0.799712	UP	12.7635	13.9947	12.7513	14.1881	12.8885	13.7169
hsa_circRNA_102082	-3.15257	10.6022	-17.6483	2.26475e-06	0.000469111	5.75068	DOWN	12.2611	8.98284	12.0918	8.95089	12.1824	9.14388
hsa_circRNA_102113	-2.83071	9.85025	-6.70237	0.000550903	0.00939821	0.132216	DOWN	11.3463	8.88375	11.3252	7.49875	11.1253	8.92218
hsa_circRNA_102171	-1.6791	7.67875	-4.55367	0.00394336	0.0274001	-2.03519	DOWN	8.60188	7.17855	8.71606	7.24742	8.23695	6.09162
hsa_circRNA_102213	1.92279	9.1949	3.83465	0.0087247	0.0438993	-2.90686	UP	8.14141	9.88167	8.23216	11.26	8.32694	9.32725
hsa_circRNA_102228	3.68105	7.06654	2.82723	0.0302897	0.103185	-4.25162	UP	2.32193	9.65215	6.6053	7.69486	6.75083	9.3742
hsa_circRNA_102245	3.92425	6.26683	4.17171	0.00595533	0.0348159	-2.48848	UP	2.32193	8.22173	6.10915	7.76286	4.48305	8.70228
hsa_circRNA_102292	-1.38532	8.13921	-4.2214	0.00563747	0.0341478	-2.42825	DOWN	9.05446	7.9534	8.3953	7.04836	9.04584	7.33789
hsa_circRNA_102328	3.75468	5.59909	3.20353	0.0186926	0.0748579	-3.73462	UP	2.32193	7.05017	6.52141	7.67617	2.32193	7.70296
hsa_circRNA_102331	-1.05392	8.41948	-2.55873	0.0432414	0.128442	-4.62765	DOWN	8.93427	7.17855	8.70285	7.81504	9.2022	8.68398
hsa_circRNA_102334	4.22392	6.37154	4.82275	0.00298669	0.0239894	-1.72906	UP	4.77416	7.924	2.32193	8.97951	5.68266	8.54701
hsa_circRNA_102355	1.32416	8.85101	4.76941	0.00315331	0.0240776	-1.7889	UP	8.56934	9.71716	8.14396	9.16833	7.8535	9.65379
hsa_circRNA_102359	-1.21768	13.4655	-4.32249	0.00504798	0.0322592	-2.30689	DOWN	14.1215	13.2875	14.0508	12.3428	14.0508	12.9397
hsa_circRNA_102374	-1.99396	10.4592	-10.902	3.69628e-05	0.0023115	3.02927	DOWN	11.3622	9.32068	11.458	9.50024	11.5484	9.56579
hsa_circRNA_102379	-3.07269	6.59937	-3.23304	0.0180139	0.0723446	-3.69473	DOWN	8.00345	6.12646	7.60755	6.17386	8.79614	2.88876
hsa_circRNA_102385	-1.88844	8.97676	-5.88811	0.00109054	0.0132606	-0.618294	DOWN	10.3339	7.98506	9.59687	7.6186	9.83215	8.49397
hsa_circRNA_102397	-2.01703	7.70231	-6.77527	0.000519905	0.00939821	0.195679	DOWN	8.6331	6.64429	8.54701	7.19176	8.95234	6.24533
hsa_circRNA_102399	-2.21625	7.00977	-4.56399	0.00390084	0.0272221	-2.02326	DOWN	7.3724	6.17386	9.16624	5.78432	7.81504	5.74675
hsa_circRNA_102400	4.68444	6.16933	3.76345	0.00947875	0.0471514	-2.99742	UP	2.32193	8.44789	2.32193	8.55981	6.83748	8.52694
hsa_circRNA_102414	1.20411	9.23724	4.49357	0.00420174	0.0287392	-2.10506	UP	8.21851	9.87528	8.92984	9.58141	8.75721	10.0612
hsa_circRNA_102415	-3.29832	6.13963	-3.15189	0.0199486	0.07745	-3.80467	DOWN	7.72699	6.68808	7.79893	2.32193	7.84044	4.46138
hsa_circRNA_102417	2.22493	9.03136	6.39097	0.000709595	0.0107112	-0.145569	UP	7.21946	10.0107	8.07697	10.2042	8.46024	10.2166
hsa_circRNA_102432	1.10854	6.96321	4.19898	0.00577847	0.0344153	-2.45538	UP	6.30584	7.90607	6.64429	7.14496	6.27668	7.50141
hsa_circRNA_102439	1.13459	8.57785	3.83644	0.00870666	0.0438993	-2.9046	UP	8.46976	9.47917	7.65485	9.06998	7.90707	8.8863
hsa_circRNA_102441	-1.98227	7.10162	-3.91086	0.00799093	0.0414882	-2.81077	DOWN	8.06535	5.69199	7.47192	7.01899	8.74101	5.62048
hsa_circRNA_102442	-2.02534	10.5077	-6.5623	0.000616613	0.00981536	0.00863245	DOWN	11.2765	9.2791	11.4703	9.16498	11.8143	10.041
hsa_circRNA_102445	-2.57188	12.8479	-6.15193	0.000867507	0.012152	-0.366448	DOWN	14.0117	11.8912	14.0787	10.6554	14.3111	12.1392
hsa_circRNA_102446	-2.00522	9.06875	-4.90505	0.00274881	0.0227037	-1.63757	DOWN	10.4969	8.08939	9.92708	7.36074	9.79013	8.74829
hsa_circRNA_102456	1.37587	8.50799	7.32799	0.000340445	0.00764255	0.658474	UP	7.87772	9.23529	7.62227	9.15151	7.96017	9.20097
hsa_circRNA_102520	1.88268	6.96164	4.38932	0.00469642	0.0306766	-2.22751	UP	6.13675	7.87055	6.75973	7.69486	5.16443	8.14354
hsa_circRNA_102546	1.40663	9.60165	7.17618	0.000381408	0.00812996	0.534505	UP	8.81307	10.4124	8.99208	10.0773	8.88985	10.4252
hsa_circRNA_102551	-1.48382	7.04718	-5.03677	0.00241147	0.0208838	-1.49319	DOWN	7.85713	6.17386	7.53939	6.81843	7.97076	5.92354
hsa_circRNA_102562	1.72799	12.9235	9.82382	6.68077e-05	0.00313309	2.4094	UP	11.9904	13.7536	12.0845	13.7095	12.1036	13.8993
hsa_circRNA_102567	1.04784	8.2754	4.51092	0.00412524	0.0284381	-2.08483	UP	8.03267	8.74829	7.37819	8.85678	7.84358	8.79289
hsa_circRNA_102570	2.05269	9.19536	10.4284	4.76095e-05	0.00268917	2.76554	UP	7.94805	10.1664	8.33403	10.1685	8.22495	10.3302
hsa_circRNA_102587	1.33658	12.3727	6.056	0.000941945	0.0127856	-0.457026	UP	11.5003	12.7635	11.7862	13.2394	11.8267	13.1201
hsa_circRNA_102600	-2.54035	8.71843	-7.05903	0.000416925	0.0083658	0.437238	DOWN	9.75772	6.77188	9.9627	8.01233	10.2454	7.56056
hsa_circRNA_102605	1.15564	8.18581	3.03521	0.0231393	0.0862063	-3.96407	UP	7.89348	8.59785	8.10781	8.67753	6.82268	9.0155
hsa_circRNA_102613	1.29022	6.72583	3.40592	0.0145431	0.0622616	-3.46324	UP	5.49814	7.00596	6.00442	7.38899	6.73962	7.71788
hsa_circRNA_102619	4.92536	7.00705	4.77737	0.00312777	0.0240776	-1.77993	UP	2.32193	9.08887	6.53703	9.84945	4.77416	9.47089
hsa_circRNA_102631	-2.17285	9.8639	-9.64383	7.41661e-05	0.00324662	2.29888	DOWN	11.214	8.67459	10.9937	8.72234	10.6433	8.9355
hsa_circRNA_102644	1.69669	9.81391	8.36244	0.000164775	0.00542636	1.44549	UP	8.96491	10.4447	8.87712	10.6451	9.05469	10.897
hsa_circRNA_102645	1.47146	8.52358	4.43249	0.00448403	0.0297407	-2.17661	UP	7.10884	9.3956	8.16002	9.27503	8.09467	9.10729
hsa_circRNA_102672	5.52507	5.65705	10.5647	4.42182e-05	0.00258087	2.84275	UP	2.32193	8.40739	4.0397	8.08806	2.32193	8.76331
hsa_circRNA_102690	-1.29684	9.27595	-2.58599	0.0416905	0.126379	-4.58931	DOWN	9.8031	9.17915	10.0827	7.4854	9.88727	9.21803
hsa_circRNA_102702	1.35374	7.17861	2.5855	0.0417174	0.126379	-4.58999	UP	5.31094	7.77553	7.24266	8.00064	6.95163	7.79027
hsa_circRNA_102707	1.17665	8.29628	4.96413	0.00259131	0.0217099	-1.57251	UP	7.48271	8.66248	7.61493	8.90071	8.02623	9.09063
hsa_circRNA_102711	4.13201	5.61668	3.9702	0.00746709	0.0404795	-2.73654	UP	2.32193	7.61124	2.32193	7.29029	6.00816	8.14651
hsa_circRNA_102719	5.59752	5.12069	30.5406	8.91008e-08	0.000120597	8.22346	UP	2.32193	8.08142	2.32193	7.76286	2.32193	7.91406
hsa_circRNA_102720	3.02783	9.11384	13.2864	1.18483e-05	0.00129665	4.18488	UP	7.31768	10.6843	7.53161	10.6363	7.95049	10.5626
hsa_circRNA_102728	-1.80174	7.65515	-5.31229	0.00184721	0.0172225	-1.19921	DOWN	8.60867	7.3622	8.85548	6.38709	8.2039	6.51354
hsa_circRNA_102737	4.94721	4.79553	28.3752	1.37747e-07	0.000120597	7.94537	UP	2.32193	7.19423	2.32193	7.22348	2.32193	7.38971
hsa_circRNA_102741	-1.36724	10.3551	-6.3171	0.000754571	0.0112785	-0.213094	DOWN	10.8818	9.74544	11.0535	9.39363	11.1808	9.87528
hsa_circRNA_102747	-1.25177	8.16988	-2.59501	0.0411899	0.12587	-4.57662	DOWN	8.64547	8.14311	8.73707	6.46265	9.00477	8.02623
hsa_circRNA_102774	-1.35136	8.6791	-4.49398	0.0041999	0.0287392	-2.10457	DOWN	9.09833	7.73942	9.17915	7.84306	9.78686	8.42779
hsa_circRNA_102777	1.63688	6.30089	4.1393	0.00617346	0.0357938	-2.52796	UP	5.12363	6.77188	5.24272	7.75286	6.08101	6.83327
hsa_circRNA_102810	-2.22402	7.95905	-5.01418	0.00246583	0.0208838	-1.51777	DOWN	9.06055	7.37819	8.88069	5.8711	9.27192	7.29183
hsa_circRNA_102815	-1.04837	6.76929	-2.84422	0.0296244	0.101901	-4.22799	DOWN	7.14666	6.87278	7.13986	6.27668	7.59392	5.58586
hsa_circRNA_102829	4.90856	5.6248	6.23733	0.000806865	0.0114863	-0.286751	UP	2.32193	8.53766	2.32193	7.2795	4.86772	8.42009
hsa_circRNA_102830	3.61855	5.49415	5.24842	0.00196326	0.0179983	-1.26641	UP	2.32193	7.25924	5.14417	7.31315	3.58853	7.33789
hsa_circRNA_102838	-2.40274	11.8445	-10.0139	5.99389e-05	0.00308685	2.52382	DOWN	12.8885	10.7363	12.8443	10.4263	13.4047	10.7667
hsa_circRNA_102885	1.34992	7.56053	3.97487	0.00742756	0.0403903	-2.73073	UP	6.57788	8.24886	7.19176	7.68437	6.88708	8.77324
hsa_circRNA_102894	1.11554	7.18383	5.27689	0.00191054	0.0176153	-1.23639	UP	6.79264	7.56183	6.7158	7.83519	6.36975	7.8278
hsa_circRNA_102922	-4.06346	5.8821	-3.12007	0.0207681	0.0795732	-3.84798	DOWN	8.65772	2.32193	7.72301	2.32193	7.36074	6.90725
hsa_circRNA_102924	-1.65121	9.04342	-6.46747	0.000666219	0.0104156	-0.0762971	DOWN	10.2194	8.00251	9.82474	8.47585	9.56294	8.17507
hsa_circRNA_102928	6.07783	6.74153	9.74863	6.97739e-05	0.00313309	2.36349	UP	2.32193	9.52949	4.76092	9.89196	4.02501	9.9199
hsa_circRNA_102956	2.13985	7.14011	2.54997	0.0437531	0.12963	-4.63998	UP	6.88708	8.30772	7.19176	8.57848	4.13173	7.74391
hsa_circRNA_103002	-3.87493	5.55759	-3.53546	0.0124255	0.0564708	-3.29239	DOWN	7.9235	6.21651	7.50605	2.32193	7.05561	2.32193
hsa_circRNA_103012	-2.34225	7.21799	-3.65222	0.0108061	0.0514169	-3.14039	DOWN	8.88985	5.12363	8.33775	5.58836	7.93975	7.42861
hsa_circRNA_103038	-1.05801	9.89733	-4.09887	0.0064582	0.0367153	-2.57744	DOWN	10.6814	9.21964	10.511	9.69296	10.0866	9.19237
hsa_circRNA_103039	1.94281	7.93276	7.04806	0.00042044	0.0083658	0.428061	UP	6.94286	8.44134	7.2016	9.11121	6.73962	9.15995
hsa_circRNA_103050	2.70058	5.83599	2.72077	0.0348447	0.111746	-4.40021	UP	6.361	6.83748	2.32193	7.14496	4.77416	7.57639
hsa_circRNA_103085	-1.94416	9.15015	-2.50441	0.0465183	0.13397	-4.70413	DOWN	9.59314	6.51617	9.99793	8.64005	10.7756	9.378
hsa_circRNA_103089	-1.03798	8.17953	-4.6558	0.00354442	0.0256718	-1.91773	DOWN	8.81307	7.53939	8.48796	7.95146	8.79451	7.49076
hsa_circRNA_103109	5.71208	6.26927	6.00962	0.000980537	0.0127922	-0.501222	UP	2.32193	9.39274	5.59583	8.45613	2.32193	9.52705
hsa_circRNA_103110	7.25936	6.92521	6.44096	0.000680895	0.0105509	-0.100223	UP	2.32193	11.5396	2.32193	8.65474	5.24272	11.4703
hsa_circRNA_103111	6.92523	6.84328	7.83115	0.000236784	0.00658758	1.05339	UP	5.49814	10.3293	2.32193	10.38	2.32193	10.2085
hsa_circRNA_103134	-1.64098	10.6309	-4.77173	0.00314582	0.0240776	-1.78628	DOWN	11.4306	10.2578	11.5985	9.10227	11.3252	10.0713
hsa_circRNA_103137	-1.78074	10.9698	-7.70607	0.000258667	0.00686251	0.957443	DOWN	12.1994	10.131	11.6906	10.2137	11.6906	9.8936
hsa_circRNA_103148	1.08555	10.5122	3.36486	0.0152952	0.0645346	-3.51787	UP	9.5696	10.6531	9.87041	11.3566	10.4681	11.1552
hsa_circRNA_103162	-1.78889	7.08398	-2.45665	0.0496167	0.139965	-4.77143	DOWN	7.68437	4.55641	8.09467	7.42931	8.15623	6.5829
hsa_circRNA_103164	1.08927	10.469	5.465	0.00160008	0.01601	-1.04083	UP	9.84945	10.8424	10.0038	10.9417	9.9199	11.2569
hsa_circRNA_103211	-1.3177	10.4033	-4.20872	0.00571672	0.0341638	-2.44358	DOWN	10.8377	9.41387	10.9498	10.2881	11.399	9.53144
hsa_circRNA_103212	-3.3382	6.15234	-3.5317	0.0124819	0.056475	-3.29732	DOWN	7.99169	6.12646	7.90004	2.32193	7.57261	5.00134
hsa_circRNA_103230	4.08434	5.50654	4.29298	0.00521261	0.0329505	-2.34217	UP	2.32193	7.52641	5.70588	7.17022	2.36531	7.94951
hsa_circRNA_103265	1.90227	7.15938	3.91255	0.00797542	0.0414882	-2.80865	UP	6.17386	7.80432	5.323	8.47855	7.12787	8.04865
hsa_circRNA_103288	-1.00106	7.5253	-4.00017	0.00721729	0.0397405	-2.69927	DOWN	8.10737	7.47192	7.98459	6.78611	7.98554	6.8163
hsa_circRNA_103297	1.13534	6.76115	3.572	0.0118914	0.0549144	-3.24461	UP	5.731	7.69021	6.64429	7.29029	6.20515	7.00596
hsa_circRNA_103309	3.41659	9.96794	12.5164	1.67294e-05	0.00172313	3.84016	UP	8.69939	11.7442	7.83624	11.7777	8.24332	11.5067
hsa_circRNA_103312	3.52115	5.48008	3.58849	0.0116588	0.054294	-3.22311	UP	6.04868	7.23869	2.32193	7.47732	2.78792	7.00596
hsa_circRNA_103339	1.7997	8.91023	8.11311	0.000194844	0.00578257	1.26452	UP	8.30239	9.68041	7.77827	9.98078	7.95049	9.76906
hsa_circRNA_103356	1.43653	7.48042	2.75609	0.0332571	0.109255	-4.35083	UP	6.66339	8.47383	7.82356	8.02623	5.79951	8.09599
hsa_circRNA_103384	1.84617	8.54206	7.29101	0.000349934	0.00775614	0.628492	UP	7.95243	9.34639	7.19176	9.52509	7.71273	9.52395
hsa_circRNA_103390	-1.08616	10.7546	-4.75932	0.00318597	0.0241499	-1.80025	DOWN	11.4229	10.0305	11.5003	10.2646	10.97	10.3396
hsa_circRNA_103405	-1.14011	10.7457	-4.57352	0.00386202	0.0271582	-2.01224	DOWN	11.5067	10.2442	11.399	9.84109	11.0415	10.4416
hsa_circRNA_103444	-1.15606	12.6827	-4.80701	0.00303478	0.0240448	-1.74667	DOWN	13.1995	12.0174	12.9703	12.2972	13.6123	11.9993
hsa_circRNA_103456	-1.73795	7.39552	-6.71588	0.000545002	0.00939821	0.144019	DOWN	7.79893	6.51617	8.38958	6.54992	8.60497	6.51354
hsa_circRNA_103487	1.89001	6.72973	2.53519	0.0446307	0.130639	-4.66079	UP	6.33741	7.90607	6.88504	8.00064	4.13173	7.11752
hsa_circRNA_103488	1.1746	8.47328	2.84279	0.0296798	0.101901	-4.22998	UP	7.01528	9.076	8.45682	8.82664	8.18585	9.2791
hsa_circRNA_103503	3.76759	5.79045	4.08497	0.00655946	0.0369312	-2.5945	UP	2.32193	7.91406	6.00442	7.33863	3.39362	7.77003
hsa_circRNA_103510	1.46983	8.65377	5.98978	0.000997601	0.0128353	-0.520215	UP	7.88842	9.41387	8.30696	9.44076	7.5612	9.31144
hsa_circRNA_103526	1.48744	6.79909	3.19727	0.0188401	0.0751458	-3.74309	UP	5.33496	7.49209	5.82519	7.24742	7.00596	7.88892
hsa_circRNA_103554	-1.68667	9.18256	-5.65048	0.00134907	0.0147639	-0.852701	DOWN	9.93668	8.01139	9.88231	8.89238	10.2587	8.1139
hsa_circRNA_103555	-1.6759	12.2273	-4.63694	0.00361453	0.0258328	-1.9393	DOWN	13.3606	11.8743	12.9909	10.6865	12.8443	11.6073
hsa_circRNA_103559	3.92411	8.40821	6.11576	0.000894746	0.0123362	-0.40046	UP	6.40423	11.0007	5.94711	8.98474	6.98713	11.1253
hsa_circRNA_103560	4.27843	9.59601	10.781	3.93941e-05	0.00237859	2.9631	UP	7.30785	12.0467	7.42931	10.8871	7.63321	12.2718
hsa_circRNA_103572	4.27378	5.36674	5.59876	0.00141423	0.015008	-0.904697	UP	2.32193	7.51921	5.04569	7.41529	2.32193	7.57639
hsa_circRNA_103589	1.08172	7.90215	3.5658	0.0119802	0.0549144	-3.2527	UP	7.51133	7.85246	7.37095	8.70746	7.2016	8.76911
hsa_circRNA_103608	-1.85262	10.2329	-5.97503	0.0010105	0.0128353	-0.534359	DOWN	11.1694	9.5095	11.2024	8.68398	11.1059	9.72641
hsa_circRNA_103627	-1.2391	9.80642	-4.1029	0.00642913	0.0366691	-2.57249	DOWN	10.4043	8.69765	10.1849	9.63047	10.6887	9.23249
hsa_circRNA_103642	4.51175	5.46843	5.97025	0.00101472	0.0128353	-0.538952	UP	2.32193	7.7562	4.99381	7.92598	2.32193	7.49076
hsa_circRNA_103655	1.53563	9.41075	5.66578	0.00133045	0.0146855	-0.837382	UP	8.64547	10.2367	9.06482	10.0012	8.21851	10.2977
hsa_circRNA_103687	-1.48776	7.08158	-3.87189	0.00835717	0.0425389	-2.8598	DOWN	8.19777	6.87278	7.31844	5.73326	7.96017	6.40707
hsa_circRNA_103710	1.29272	6.7602	2.64756	0.0384002	0.119007	-4.50281	UP	5.39334	7.01992	6.88504	7.0798	6.06314	8.11996
hsa_circRNA_103723	-2.40289	9.98131	-5.46619	0.00159831	0.01601	-1.0396	DOWN	10.8201	8.03221	11.0117	9.46495	11.7165	8.84244
hsa_circRNA_103727	-2.39875	7.56741	-3.02317	0.0234991	0.0869866	-3.98061	DOWN	8.65534	4.48305	8.7937	7.42931	8.85132	7.19176
hsa_circRNA_103740	1.72836	8.2826	6.6364	0.000580793	0.00963616	0.0742835	UP	7.39686	9.3388	7.41106	8.66337	7.44733	9.43816
hsa_circRNA_103749	-2.47959	9.69694	-9.37375	8.70444e-05	0.00354453	2.12896	DOWN	10.7635	8.11996	10.8659	8.3903	11.1808	8.86118
hsa_circRNA_103757	1.06732	8.03355	2.87856	0.0283267	0.0990019	-4.18029	UP	7.44112	8.97187	7.28027	7.81504	7.77827	8.91472
hsa_circRNA_103791	-1.28149	7.23482	-3.72451	0.00992161	0.0482576	-3.04727	DOWN	7.4181	7.13131	7.92845	6.33145	8.28014	6.31946
hsa_circRNA_103801	-1.95508	10.4976	-5.92955	0.00105151	0.0128755	-0.578159	DOWN	11.8006	9.91567	11.624	9.06303	11.0007	9.58141
hsa_circRNA_103814	-3.85287	5.97049	-5.16335	0.00213093	0.0191347	-1.35679	DOWN	7.85713	4.80889	7.55737	2.32193	8.27626	5.00134
hsa_circRNA_103825	-1.29771	6.87963	-4.6702	0.00349195	0.0254767	-1.9013	DOWN	7.66673	6.64429	7.48942	6.30128	7.42931	5.74675
hsa_circRNA_103832	-1.19043	7.00711	-4.46298	0.0043405	0.0291196	-2.14081	DOWN	7.73829	6.64429	7.66614	5.94711	7.40256	6.64429
hsa_circRNA_103887	-1.16161	9.08733	-4.3861	0.00471274	0.0306766	-2.23133	DOWN	9.64331	8.66958	9.2727	8.46976	10.0884	8.38023
hsa_circRNA_103899	2.03497	7.19831	7.50752	0.00029838	0.00729045	0.802147	UP	6.03774	7.83939	6.00442	8.54733	6.50032	8.26067
hsa_circRNA_103929	-2.5401	7.90952	-7.82975	0.000237018	0.00658758	1.05232	DOWN	9.22448	6.0304	9.08975	6.69622	9.22448	7.19176
hsa_circRNA_103951	1.75133	10.4408	5.66325	0.00133352	0.0146855	-0.83992	UP	9.77374	11.6073	9.52035	10.7204	9.4013	11.6217
hsa_circRNA_103998	1.3031	7.82584	5.5171	0.00152456	0.0157029	-0.987513	UP	7.11665	8.30772	7.06461	8.84741	7.3416	8.27704
hsa_circRNA_104022	4.32101	6.27171	5.20089	0.00205501	0.018548	-1.31678	UP	4.34788	8.18006	2.32193	8.27781	5.66381	8.83877
hsa_circRNA_104029	-2.79332	7.37149	-9.58674	7.66934e-05	0.00327458	2.26337	DOWN	8.66603	6.24215	8.56553	6.20026	9.07288	5.48209
hsa_circRNA_104038	-3.8914	5.49885	-3.76457	0.00946634	0.0471514	-2.99599	DOWN	7.31315	2.32193	7.81076	6.01561	7.20974	2.32193
hsa_circRNA_104050	-2.3519	11.2145	-11.5907	2.60302e-05	0.00207065	3.39095	DOWN	12.3733	9.93496	12.3428	10.3091	12.4553	9.87169
hsa_circRNA_104075	-1.21057	9.2082	-4.67853	0.00346197	0.0254702	-1.8918	DOWN	10.0127	8.96419	9.50156	8.46433	9.92622	8.38023
hsa_circRNA_104081	-5.57614	5.11	-21.4495	7.1954e-07	0.00034378	6.72903	DOWN	8.35144	2.32193	7.82356	2.32193	7.51921	2.32193
hsa_circRNA_104084	5.63397	9.24662	19.7675	1.16371e-06	0.00034378	6.33102	UP	5.94711	12.1699	6.85212	12.1601	6.48966	11.8608
hsa_circRNA_104099	-2.02751	11.2848	-5.07706	0.00231786	0.0202929	-1.44953	DOWN	12.3428	10.6118	12.3929	9.40361	12.1601	10.7978
hsa_circRNA_104126	-1.58697	10.513	-7.14667	0.000390015	0.00812996	0.510136	DOWN	11.1606	9.60415	11.3008	9.52509	11.458	10.0292
hsa_circRNA_104134	-1.17218	10.8488	-5.02585	0.00243757	0.0208838	-1.50506	DOWN	11.3086	9.99699	11.6338	10.2085	11.3622	10.5827
hsa_circRNA_104139	-1.30643	6.86764	-4.54251	0.00398996	0.0276143	-2.04812	DOWN	7.42232	5.76013	7.33863	6.61269	7.80163	6.27046
hsa_circRNA_104148	-1.7947	7.83926	-3.25533	0.0175191	0.0705193	-3.66466	DOWN	9.23509	8.02623	8.7611	6.09866	8.21365	6.70085
hsa_circRNA_104169	2.02139	9.00041	5.35865	0.00176786	0.0169154	-1.15079	UP	7.81557	10.5626	7.99735	9.23129	8.15623	10.2394
hsa_circRNA_104193	-1.37596	9.71841	-6.00477	0.000984677	0.0127922	-0.50586	DOWN	10.196	8.84244	10.3445	8.97498	10.6786	9.27386
hsa_circRNA_104200	-1.88682	8.17931	-9.81853	6.70116e-05	0.00313309	2.40618	DOWN	9.12592	7.40256	8.98165	7.15681	9.2606	7.14836
hsa_circRNA_104203	-1.10951	8.22831	-2.70452	0.0356022	0.113758	-4.42295	DOWN	8.4745	8.20838	8.75136	6.85212	9.12334	7.96017
hsa_circRNA_104220	1.65804	7.5653	4.4369	0.00446293	0.0297133	-2.17142	UP	6.2921	8.65772	7.06461	7.72585	6.85212	8.79938
hsa_circRNA_104227	1.6485	7.39969	3.90039	0.0080875	0.0416506	-2.82392	UP	5.97987	8.55278	7.13131	8.56934	6.61515	7.54969
hsa_circRNA_104251	-1.30061	7.47927	-3.34134	0.0157453	0.0654503	-3.54927	DOWN	8.1684	7.58268	7.94951	6.13675	8.27082	6.76747
hsa_circRNA_104268	1.07017	11.2316	5.46559	0.0015992	0.01601	-1.04021	UP	10.7466	11.6742	10.484	11.7563	10.8588	11.8694
hsa_circRNA_104270	2.16092	9.16985	8.81111	0.000123167	0.00449304	1.75833	UP	7.77388	10.0038	8.14396	10.4885	8.35033	10.2587
hsa_circRNA_104285	1.65193	7.14906	4.47989	0.00426315	0.0289333	-2.12103	UP	6.04868	7.28027	6.70085	8.24093	6.21974	8.40385
hsa_circRNA_104310	-2.39559	12.7603	-9.10007	0.000102812	0.00400051	1.95157	DOWN	13.7536	11.4511	13.8993	11.274	14.2213	11.9623
hsa_circRNA_104313	-2.51158	8.57635	-2.98943	0.0245396	0.0887787	-4.02701	DOWN	10.0361	8.41305	9.90919	5.33496	9.55112	8.21365
hsa_circRNA_104315	-1.20767	12.768	-6.54023	0.000627767	0.00990289	-0.01104	DOWN	13.2875	12.2611	13.3514	12.0092	13.4767	12.2223
hsa_circRNA_104342	-1.412	10.8209	-4.48186	0.00425427	0.0289333	-2.11873	DOWN	11.7332	10.6297	11.5599	9.5936	11.2875	10.1214
hsa_circRNA_104374	-2.26037	7.33374	-4.03197	0.00696233	0.0387017	-2.65985	DOWN	8.69301	5.39334	8.27588	7.47056	8.42289	5.74675
hsa_circRNA_104381	-2.68577	6.14056	-2.51088	0.0461146	0.133026	-4.69502	DOWN	7.33118	5.85457	6.97476	2.32193	8.14439	6.21651
hsa_circRNA_104400	-1.55283	10.8902	-8.16038	0.000188685	0.00577501	1.29923	DOWN	11.6463	10.0977	11.865	10.0875	11.4886	10.1561
hsa_circRNA_104401	-1.72681	10.9456	-6.72066	0.000542929	0.00939821	0.148196	DOWN	12.0367	10.3169	11.943	9.79555	11.4472	10.134
hsa_circRNA_104417	5.18319	5.80415	6.69798	0.000552836	0.00939821	0.128376	UP	2.32193	8.38023	4.99381	7.98885	2.32193	8.81814
hsa_circRNA_104418	5.53528	5.08957	12.2594	1.88552e-05	0.00177007	3.71941	UP	2.32193	6.85316	2.32193	8.53345	2.32193	8.18502
hsa_circRNA_104419	5.62539	6.18621	6.28837	0.000772944	0.0112785	-0.239534	UP	2.32193	9.10882	5.4767	8.58976	2.32193	9.29813
hsa_circRNA_104475	1.10107	10.4473	5.52851	0.00150857	0.0156302	-0.975887	UP	9.6397	10.9352	10.0237	11.0346	10.0269	11.0237
hsa_circRNA_104495	1.13846	10.8114	5.02025	0.00245108	0.0208838	-1.51116	UP	10.2249	11.2	10.1752	11.7442	10.3263	11.1975
hsa_circRNA_104510	-1.75433	8.50359	-4.34528	0.00492486	0.0318208	-2.27974	DOWN	9.31144	6.97189	9.14282	8.40598	9.68801	7.50141
hsa_circRNA_104513	-2.20817	9.9705	-11.6104	2.57773e-05	0.00207065	3.40095	DOWN	11.1253	8.85132	10.9898	8.69707	11.1087	9.05084
hsa_circRNA_104527	2.21743	7.19627	5.23027	0.00199774	0.018219	-1.28561	UP	5.27413	8.19982	6.25795	8.70141	6.73059	8.01372
hsa_circRNA_104558	-1.70299	6.80646	-2.94005	0.0261539	0.0930803	-4.09514	DOWN	7.76064	5.12363	7.60199	5.44944	7.61124	7.29183
hsa_circRNA_104572	1.67737	7.54722	2.84108	0.0297461	0.101929	-4.23235	UP	5.44393	8.70228	7.44457	7.84306	7.2371	8.61236
hsa_circRNA_104575	4.77541	7.16961	10.1778	5.46682e-05	0.00299137	2.62063	UP	4.11795	9.2791	4.42826	9.67513	5.79951	9.71773
hsa_circRNA_104595	2.17395	11.3468	7.78307	0.000244933	0.00670121	1.01668	UP	10.3278	12.0566	10.1113	12.9397	10.3404	12.305
hsa_circRNA_104598	-1.48567	10.4703	-6.90571	0.00046931	0.0089322	0.307787	DOWN	11.3742	9.8031	11.2715	9.88727	10.9937	9.49191
hsa_circRNA_104616	-1.88234	9.23346	-3.05947	0.0224327	0.0841108	-3.93081	DOWN	10.6451	9.00243	10.1018	6.93895	9.77703	8.9355
hsa_circRNA_104625	1.7657	9.56695	8.5099	0.000149524	0.00515925	1.55008	UP	8.65534	10.5408	8.46024	10.3404	8.93673	10.4681
hsa_circRNA_104635	-2.61087	6.97993	-2.96399	0.0253575	0.0911724	-4.06209	DOWN	8.4745	6.91922	7.70699	3.66635	8.67459	6.4379
hsa_circRNA_104643	-1.28699	7.36109	-3.32749	0.016017	0.0661455	-3.56778	DOWN	7.98601	5.94711	8.17424	7.3724	7.8535	6.83327
hsa_circRNA_104645	5.23861	4.94123	19.9063	1.11679e-06	0.00034378	6.36581	UP	2.32193	7.06461	2.32193	7.82674	2.32193	7.79027
hsa_circRNA_104650	1.30985	10.3272	6.58192	0.000606887	0.00974917	0.0260769	UP	9.68363	11.0415	9.74544	10.7444	9.58783	11.1606
hsa_circRNA_104652	-1.24911	9.44243	-5.85115	0.00112675	0.0133307	-0.654273	DOWN	10.0325	9.00243	9.89965	8.86144	10.2688	8.58976
hsa_circRNA_104689	5.01809	4.96252	17.4606	2.41119e-06	0.000469111	5.69444	UP	2.32193	7.56183	2.32193	7.85817	2.71655	6.99469
hsa_circRNA_104694	-3.57034	6.12849	-3.95276	0.007617	0.0406627	-2.75831	DOWN	8.21851	5.94711	7.57198	4.76092	7.95049	2.32193
hsa_circRNA_104698	3.73081	5.36954	5.94484	0.00103752	0.0128353	-0.563409	UP	4.77416	7.3622	3.41632	7.50935	2.32193	6.83327
hsa_circRNA_104701	1.96781	6.14705	5.62093	0.00138587	0.0149698	-0.882364	UP	5.85457	7.34899	4.81744	7.19176	4.81744	6.85212
hsa_circRNA_104756	1.1738	12.824	4.72183	0.00331082	0.0247746	-1.84261	UP	11.865	13.1668	12.3733	13.5525	12.4731	13.5135
hsa_circRNA_104764	1.81695	6.52637	4.38155	0.00473587	0.030713	-2.23671	UP	5.31094	6.80774	5.323	7.47056	6.21974	8.02623
hsa_circRNA_104803	-1.7666	7.35352	-2.65231	0.0381582	0.118712	-4.49615	DOWN	8.18047	6.21651	8.35033	5.25537	8.17964	7.93877
hsa_circRNA_104807	1.5681	6.79234	4.60999	0.00371745	0.0264604	-1.97023	UP	5.57581	7.53291	6.7158	7.69486	5.73326	7.50141
hsa_circRNA_104833	1.24321	9.77079	4.83959	0.00293617	0.0236923	-1.71026	UP	9.12979	10.4156	9.54727	10.2442	8.77049	10.5174
hsa_circRNA_104864	-1.81394	7.93453	-6.77746	0.000519005	0.00939821	0.197576	DOWN	8.97498	6.9526	8.43267	6.81843	9.11685	7.31164
hsa_circRNA_104865	-1.99011	7.65124	-2.99789	0.0242741	0.0882588	-4.01537	DOWN	8.71206	7.44664	8.33142	7.39829	8.89541	5.12363
hsa_circRNA_104866	1.49862	7.93943	5.2764	0.00191143	0.0176153	-1.2369	UP	7.49276	8.50593	6.70085	8.61329	7.37675	8.94699
hsa_circRNA_104878	-1.01151	9.36017	-2.90708	0.0272954	0.0967494	-4.14075	DOWN	9.75952	9.19237	9.78045	8.13501	10.0578	9.23589
hsa_circRNA_104902	-5.60655	6.37227	-5.41163	0.0016819	0.0162228	-1.09581	DOWN	9.22769	2.32193	9.0789	2.32193	9.22005	6.06314
hsa_circRNA_104907	-4.35821	6.20375	-5.60819	0.00140208	0.0149698	-0.895185	DOWN	8.81788	4.41705	7.94757	5.33496	8.38311	2.32193
hsa_circRNA_104948	4.19122	5.44556	5.45027	0.0016222	0.0160478	-1.05596	UP	2.32193	7.45694	4.94	8.33329	2.78792	6.83327
hsa_circRNA_104970	1.06772	7.09504	2.72937	0.0344507	0.111368	-4.38817	UP	6.98523	7.50539	6.00442	8.23296	6.6939	7.14836
hsa_circRNA_104986	-4.4114	5.79209	-8.42929	0.000157649	0.00530852	1.49312	DOWN	8.12729	2.64147	7.36147	4.35964	8.50461	3.75806
hsa_circRNA_105013	-1.39458	9.71427	-6.27365	0.000782555	0.0113118	-0.253119	DOWN	10.6311	8.83982	10.3191	8.91547	10.2845	9.29565
hsa_circRNA_105019	-3.4124	6.18316	-4.25365	0.0054414	0.0334312	-2.38937	DOWN	7.90205	2.88876	7.36147	4.50439	8.40456	6.03774
hsa_circRNA_105030	2.29206	5.97135	3.86109	0.00846197	0.0429476	-2.87343	UP	6.04868	6.93699	4.76092	7.14496	3.66635	7.27018
hsa_circRNA_105036	1.56252	7.35518	3.73221	0.00983227	0.0480902	-3.0374	UP	6.06314	7.924	6.23419	8.51647	7.42442	7.96884
hsa_circRNA_400004	-4.06531	5.33657	-4.77161	0.00314622	0.0240776	-1.78642	DOWN	7.91107	2.32193	7.17855	2.32193	7.01807	5.2679
hsa_circRNA_400014	1.13021	7.84539	4.08053	0.00659218	0.0369965	-2.59996	UP	7.04472	8.51319	7.06461	8.11953	7.73152	8.59878
hsa_circRNA_400027	-3.20192	9.85919	-7.71816	0.000256453	0.00686251	0.966778	DOWN	11.3252	8.55278	11.4735	7.36074	11.5818	8.86118
hsa_circRNA_400029	6.79343	5.71864	14.4155	7.3813e-06	0.00107705	4.64846	UP	2.32193	8.05001	2.32193	9.51904	2.32193	9.77703
hsa_circRNA_400040	-2.13831	12.9054	-6.68206	0.000559911	0.00942696	0.114436	DOWN	13.8993	12.1601	13.9456	11.1787	14.0787	12.1699
hsa_circRNA_400087	2.43282	10.4497	10.9253	3.6515e-05	0.0023115	3.04192	UP	9.07956	11.514	9.47917	11.9245	9.14112	11.5599
hsa_circRNA_400103	-1.19047	8.67166	-3.43981	0.013953	0.0608628	-3.41832	DOWN	9.42002	7.54969	8.7622	8.38023	9.61844	8.29934
